# Supplementary material
Source: Springer Nature journal article supplement (https://www.springermedizin.de/resource/supplementary/12967_2008_298_MOESM2_ESM.pdf/9576138)

## Membrane based model for essential tremor

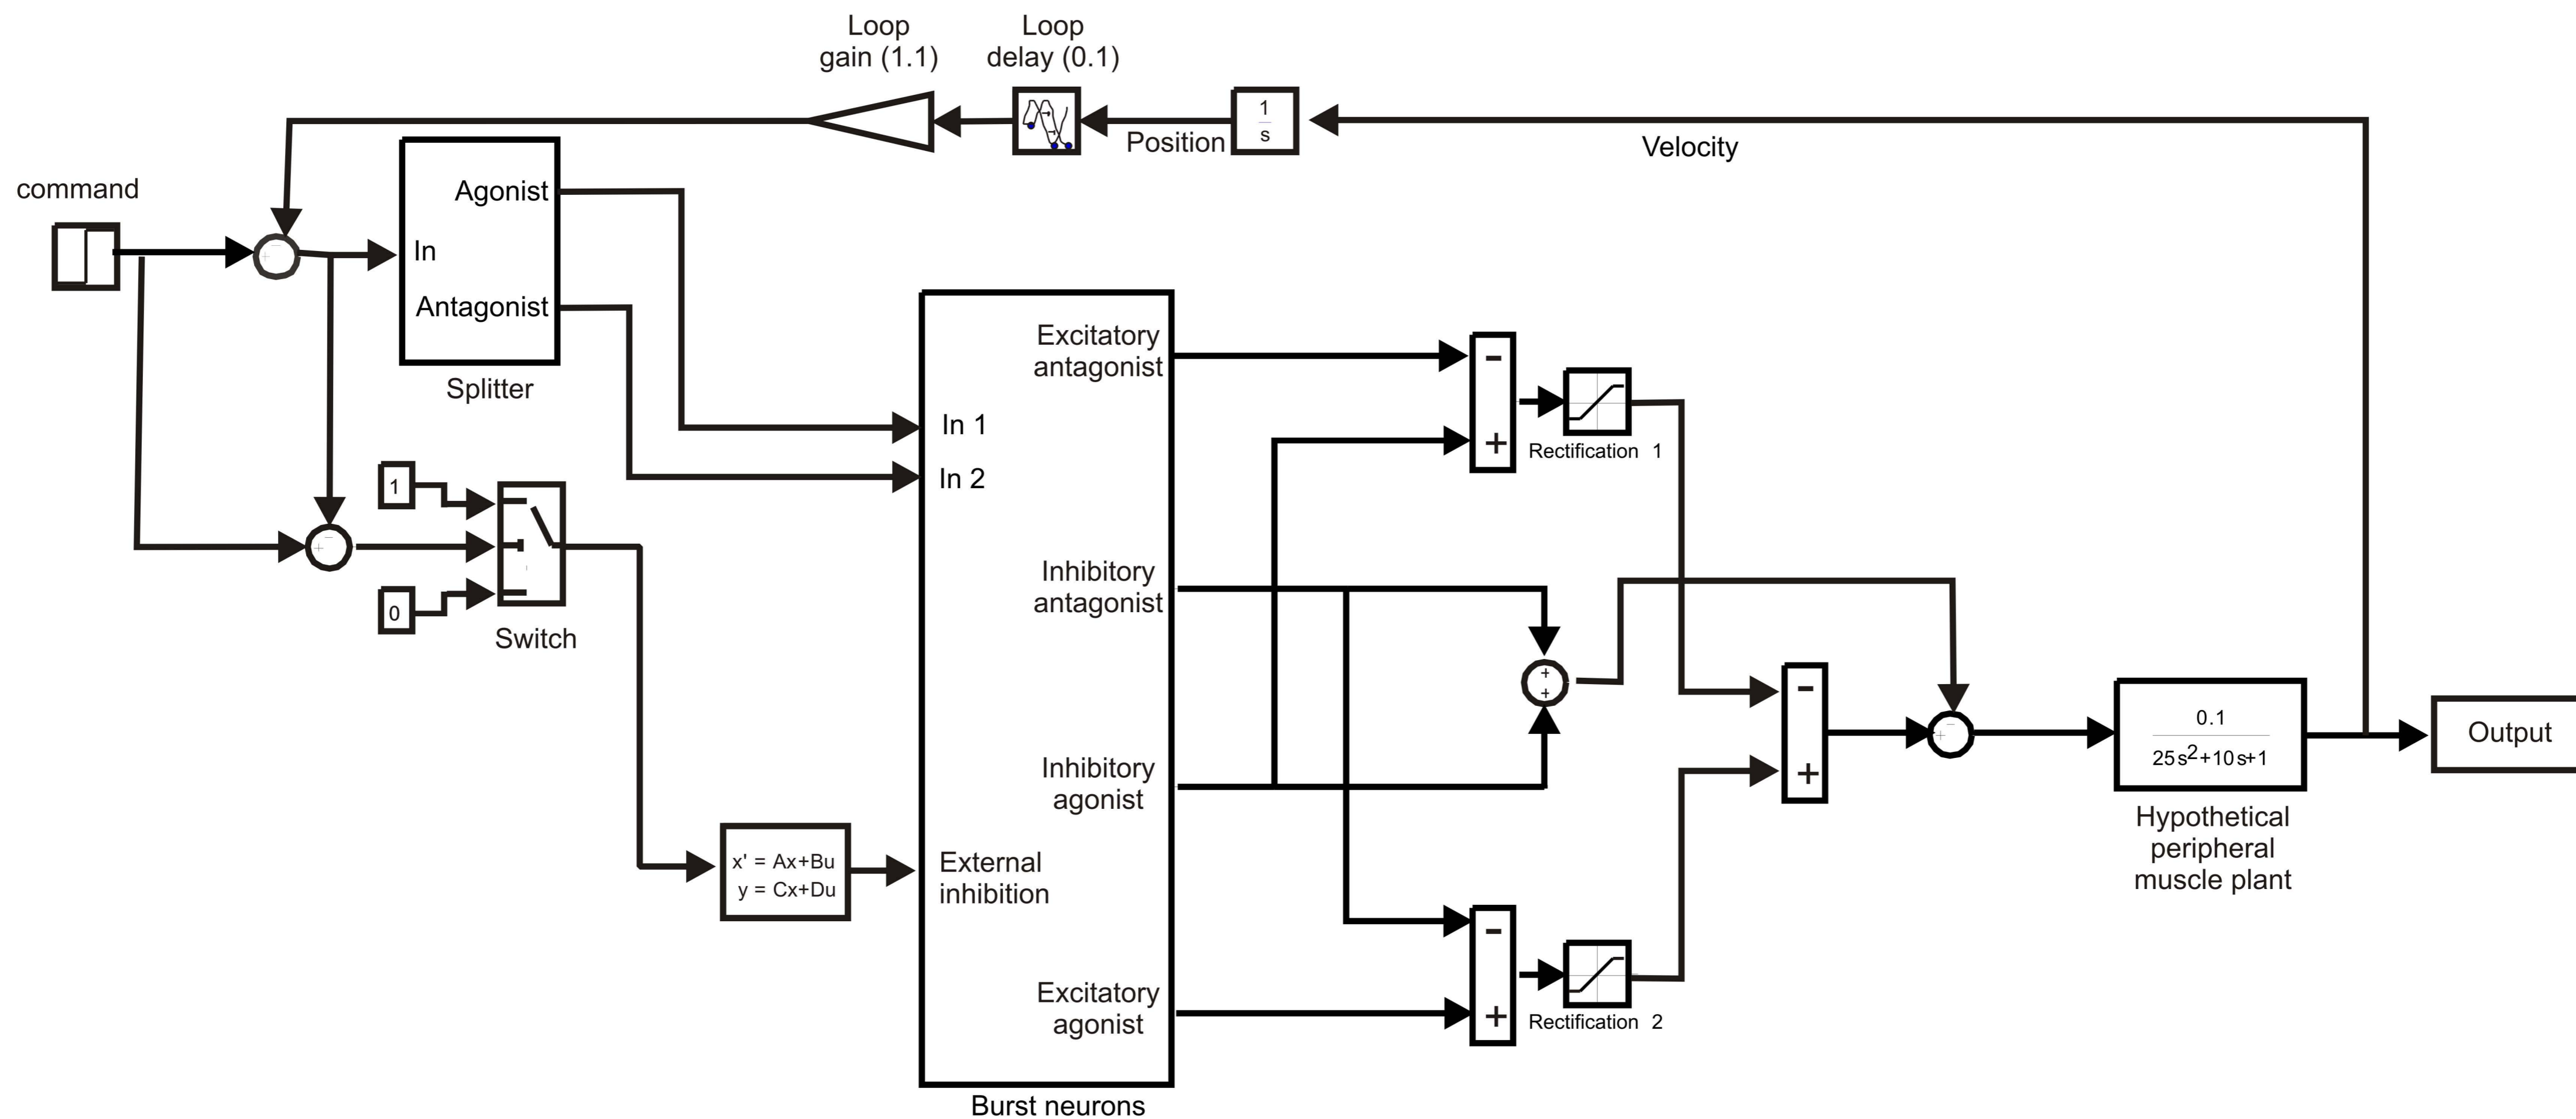

## Model burst neurons and their connectivity

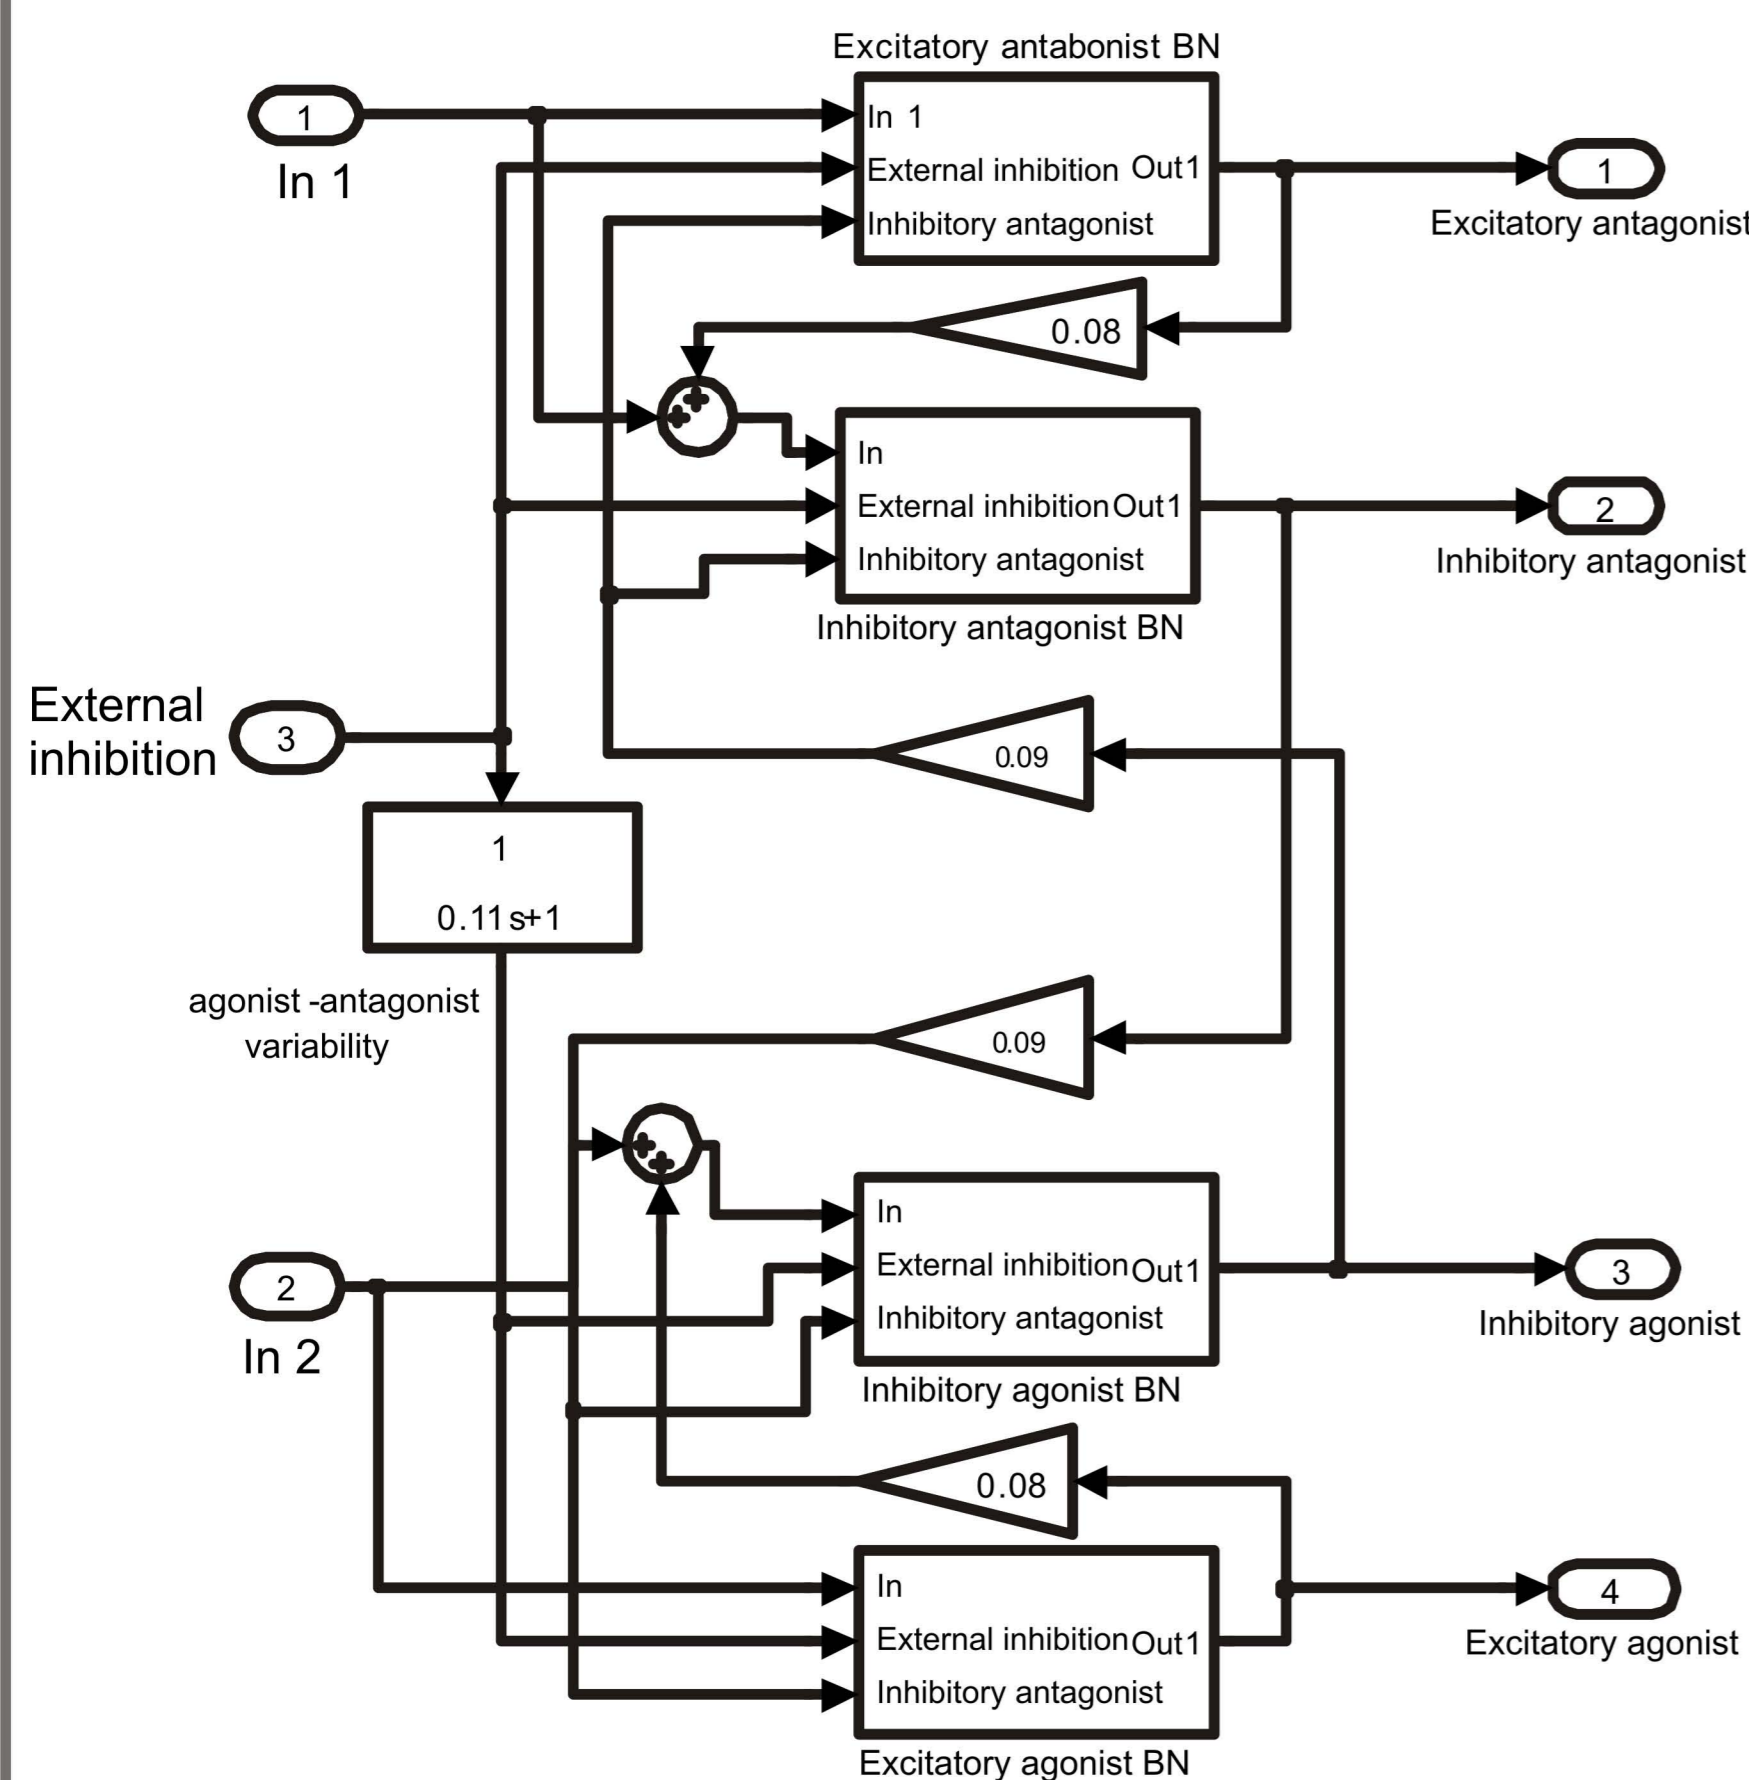

## Burst neuron membrane

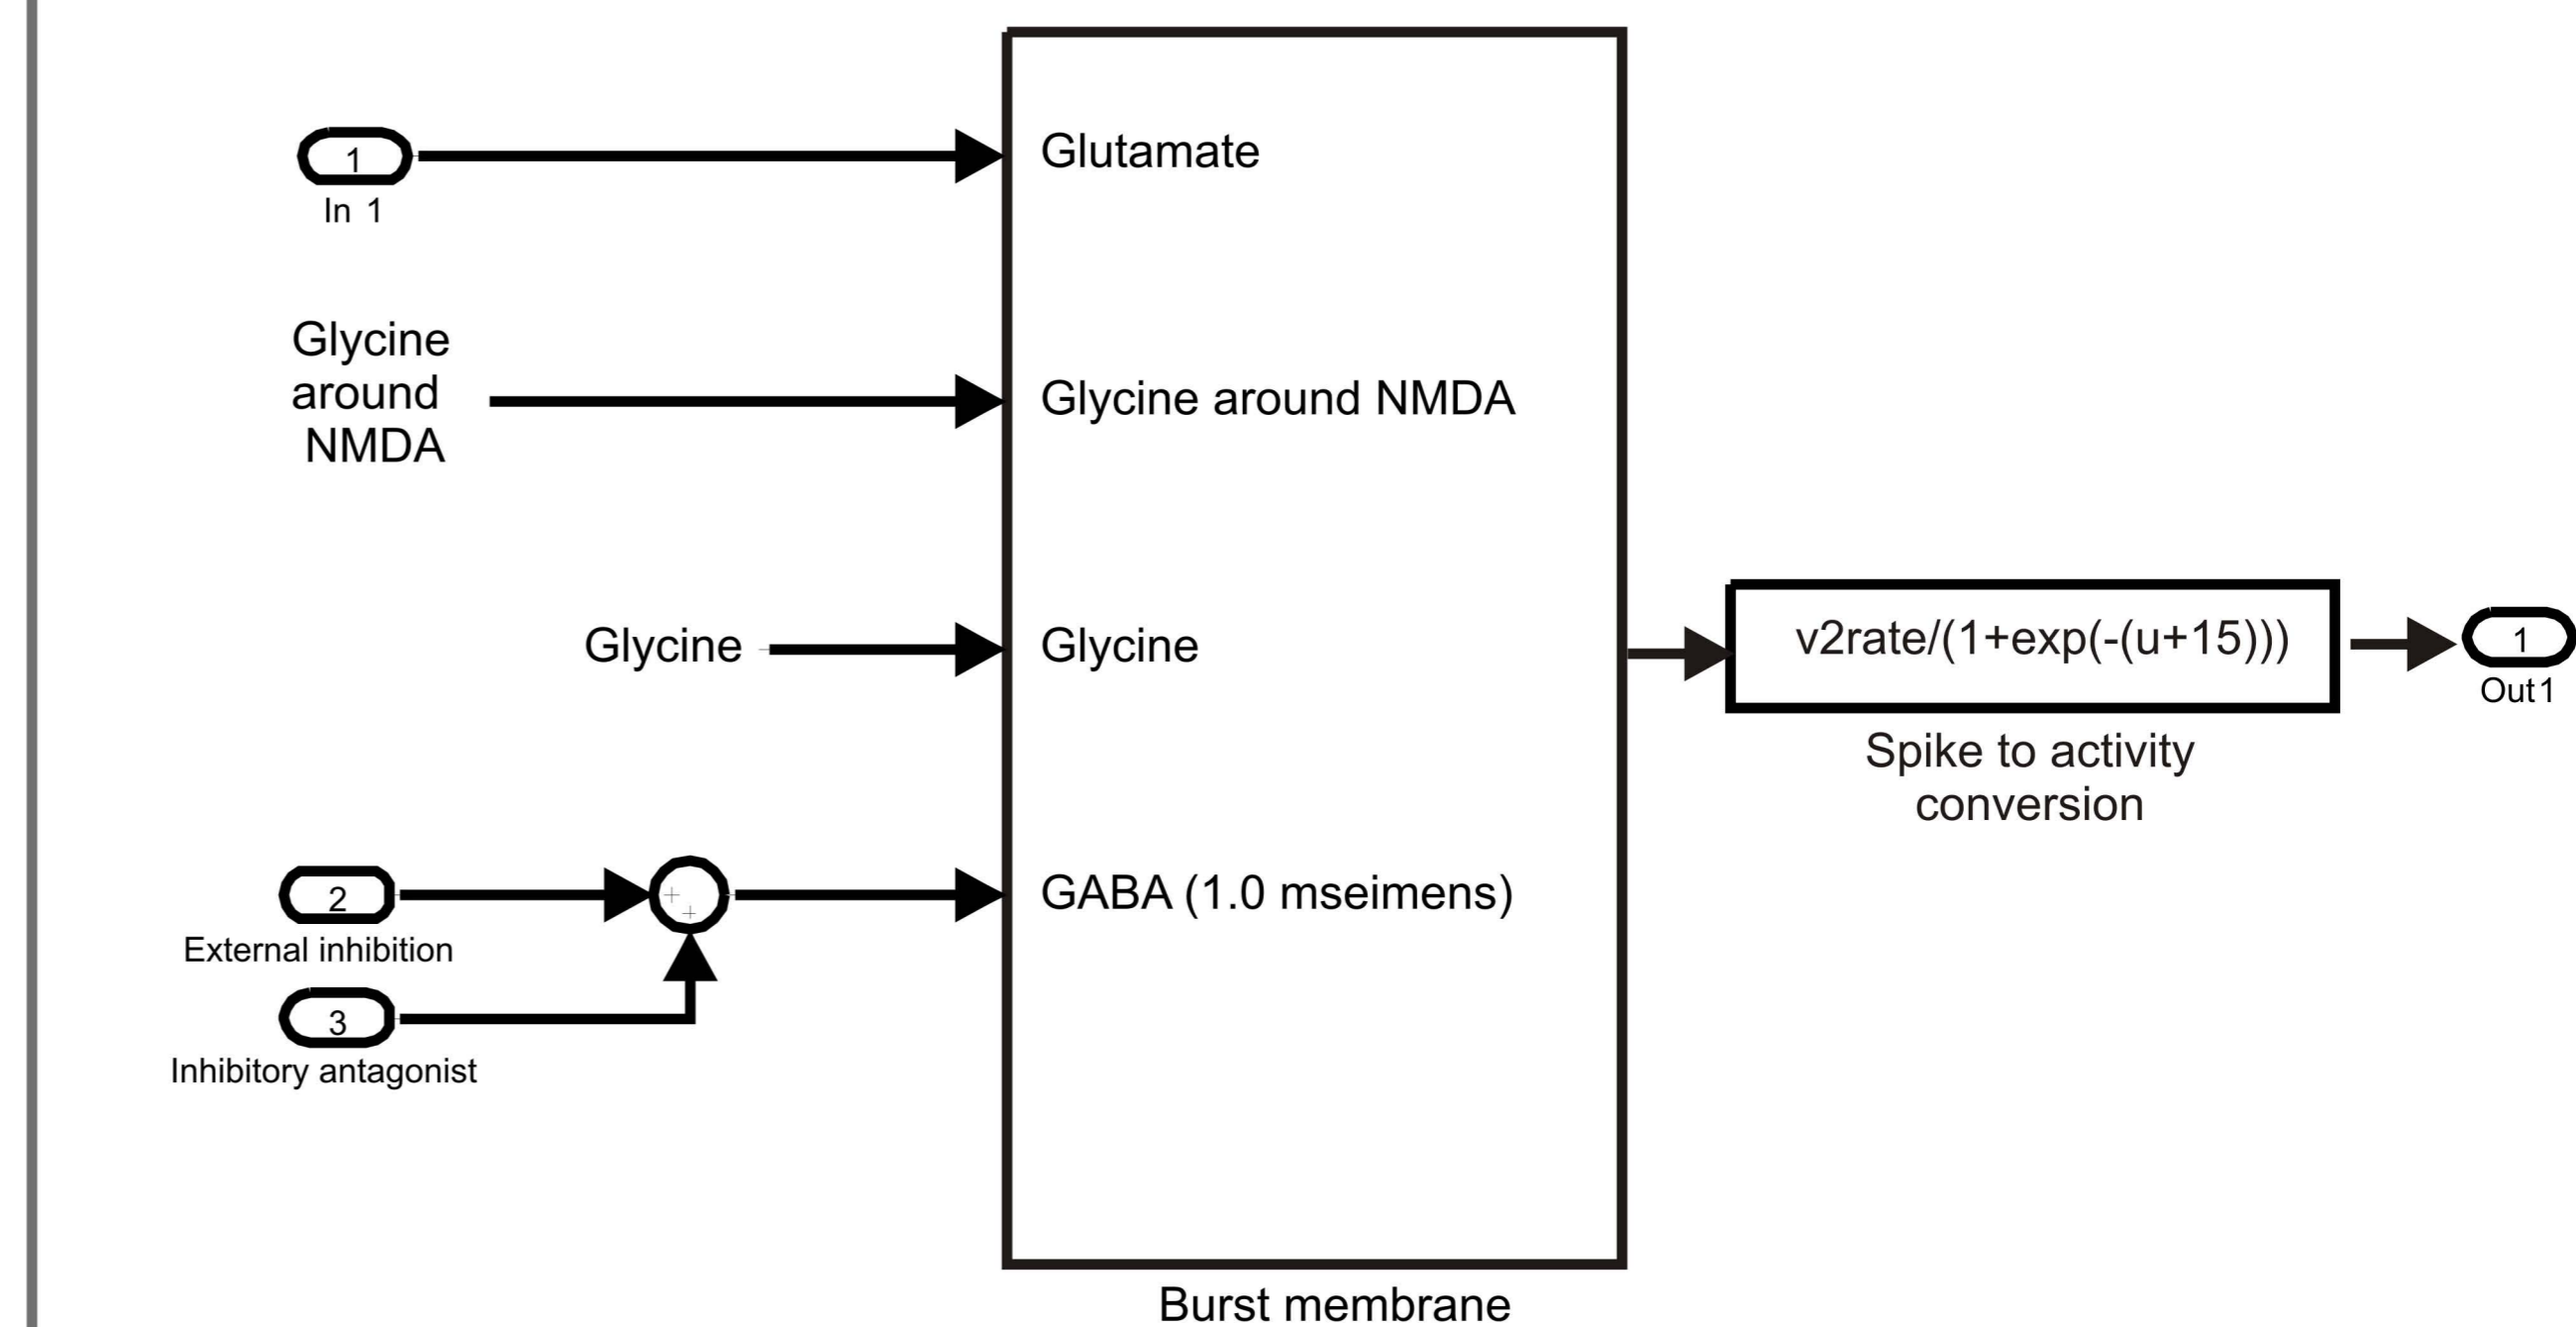

Supplement: MOESM2 [file 9576138]
